# Supplementary material
Source: PubMed Central journal article supplement (PMC3988273)

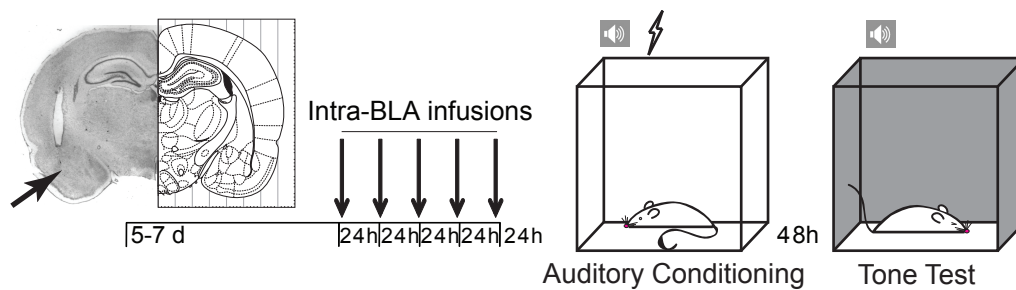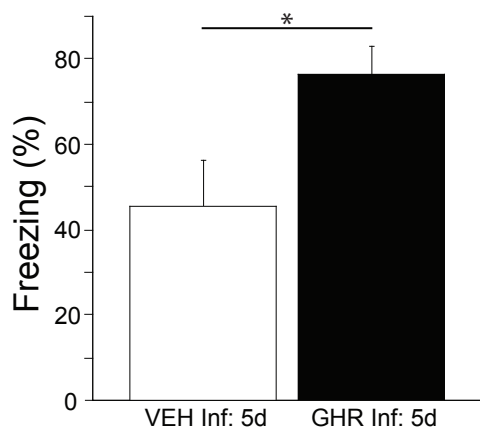

Supplement: NIHMS560310-supplement-10.pdf [file NIHMS560310-supplement-10.pdf]

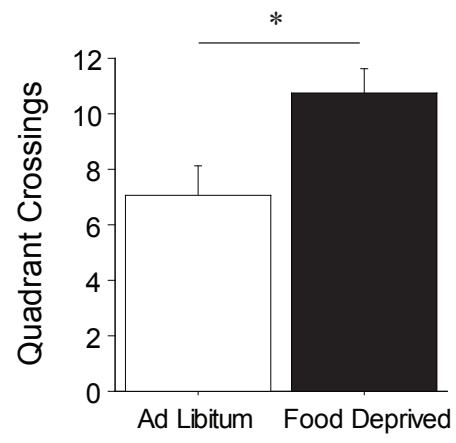

Supplement: NIHMS560310-supplement-11.pdf [file NIHMS560310-supplement-11.pdf]

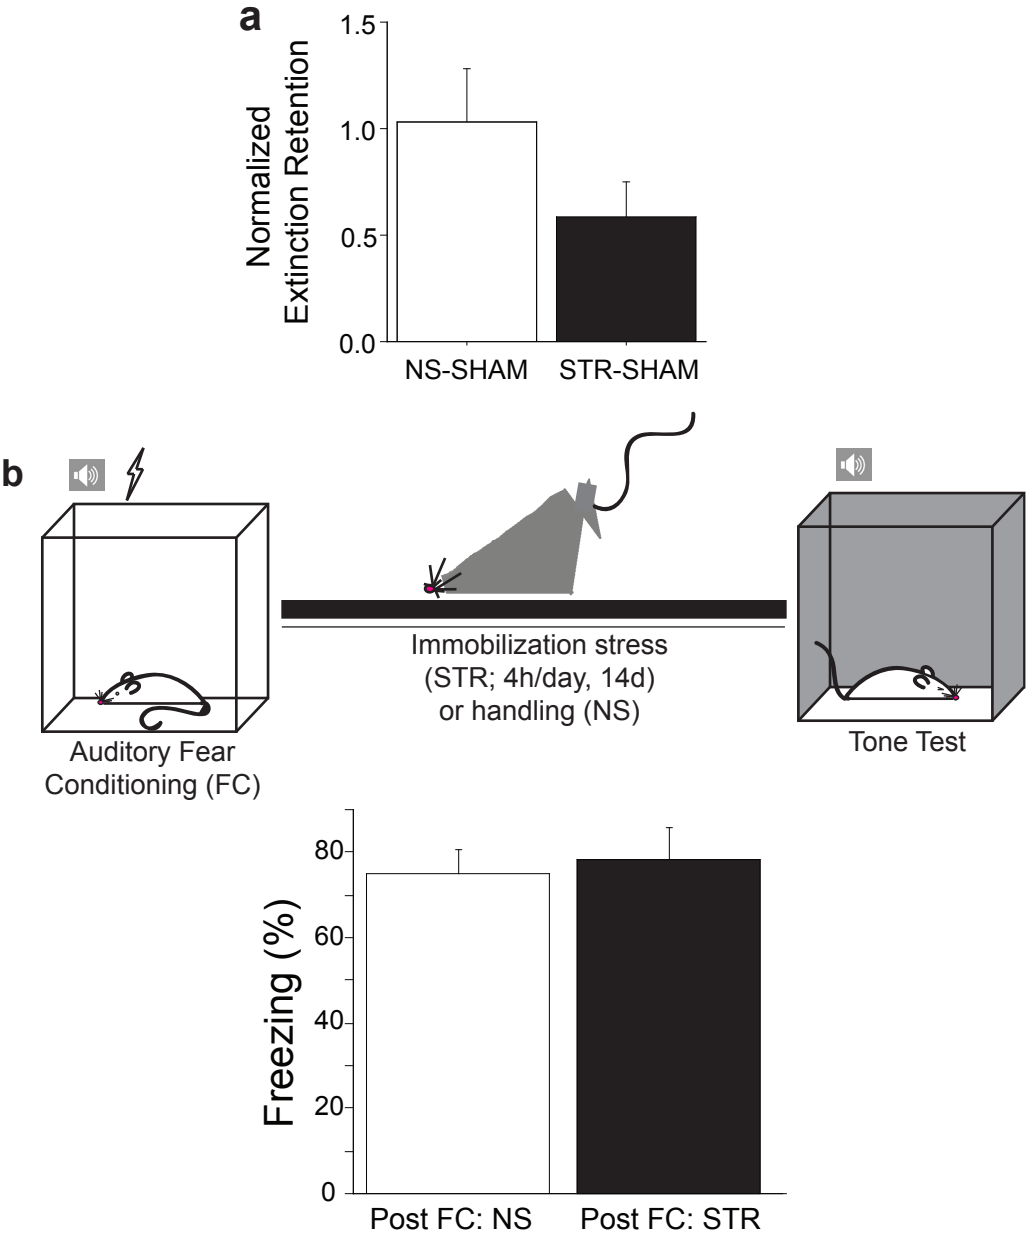

Supplement: NIHMS560310-supplement-2.pdf [file NIHMS560310-supplement-2.pdf]

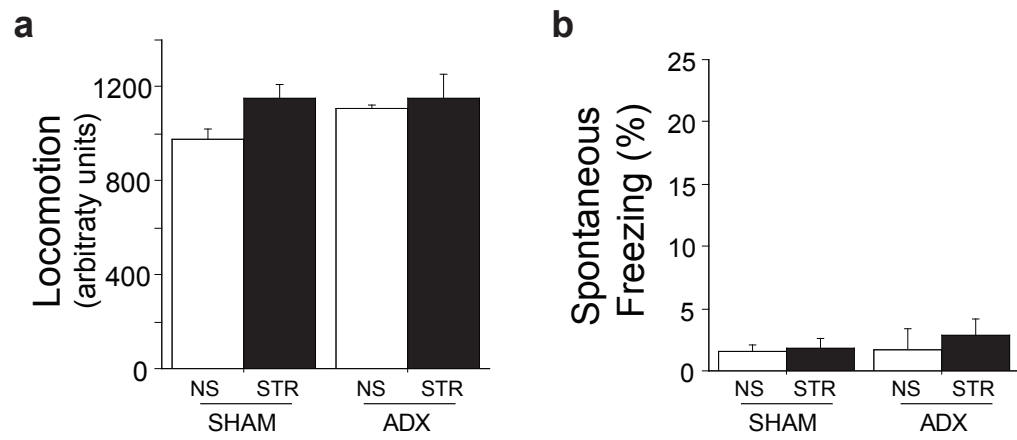

Supplement: NIHMS560310-supplement-3.pdf [file NIHMS560310-supplement-3.pdf]

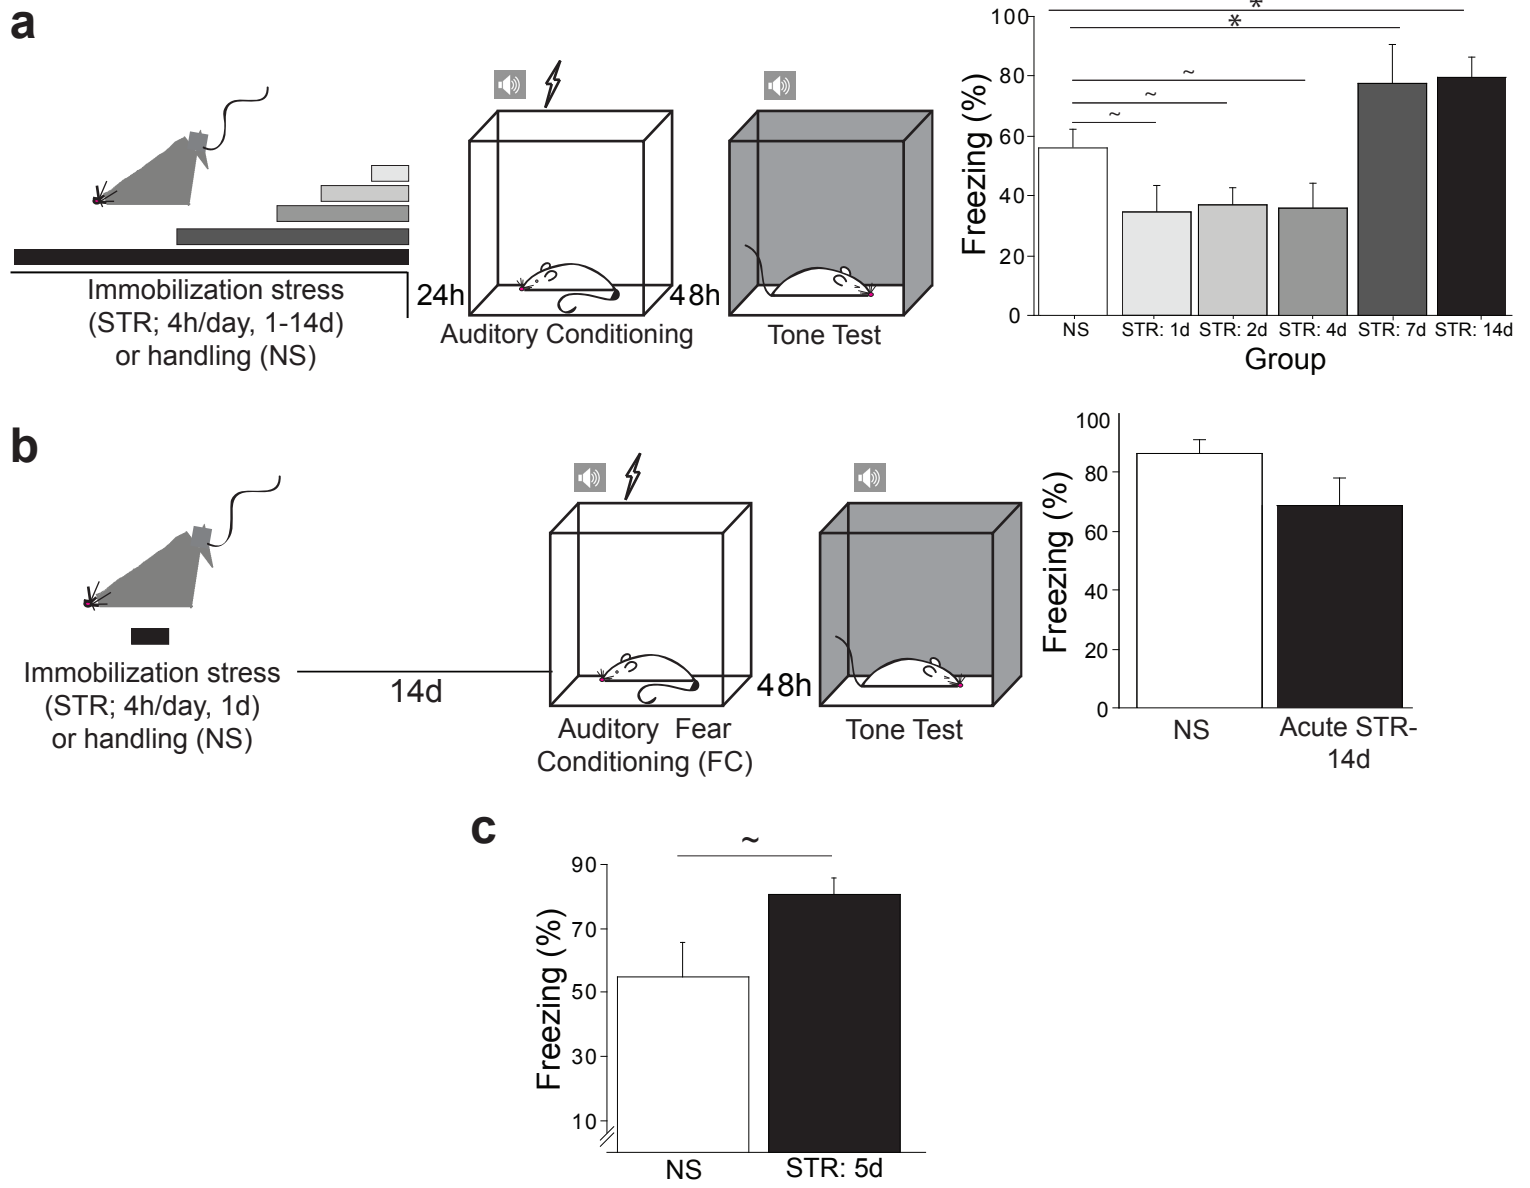

Supplement: NIHMS560310-supplement-4.pdf [file NIHMS560310-supplement-4.pdf]

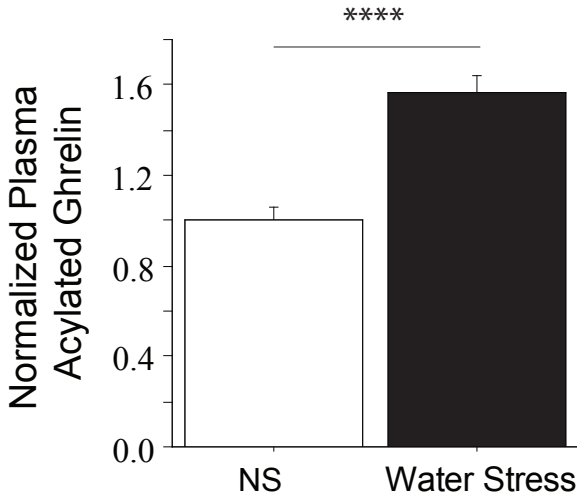

Supplement: NIHMS560310-supplement-5.pdf [file NIHMS560310-supplement-5.pdf]

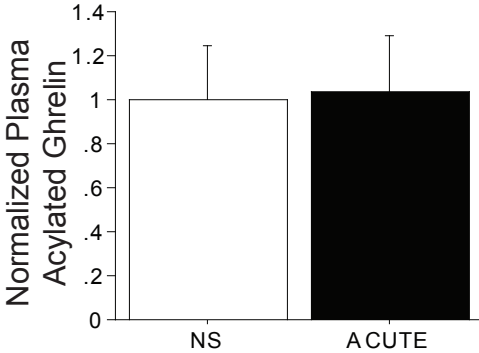

Supplement: NIHMS560310-supplement-6.pdf [file NIHMS560310-supplement-6.pdf]

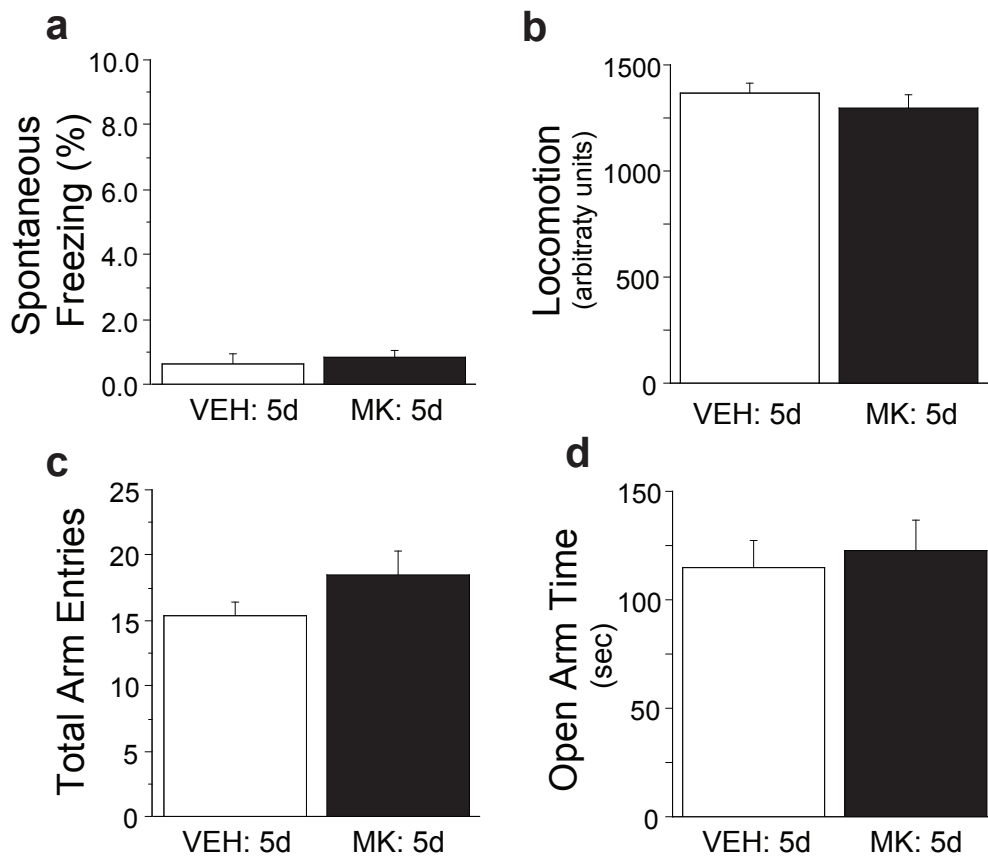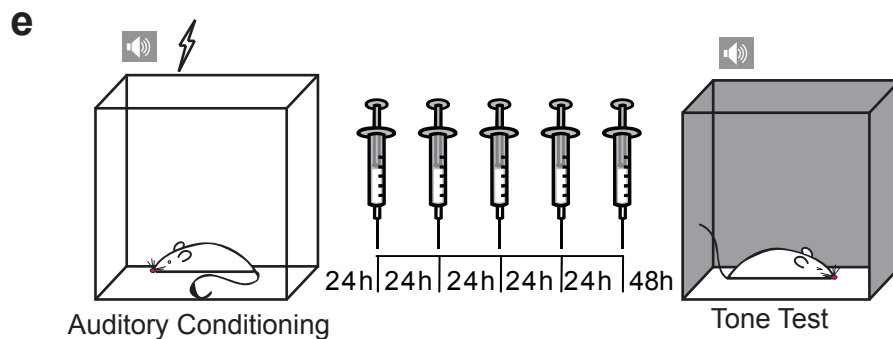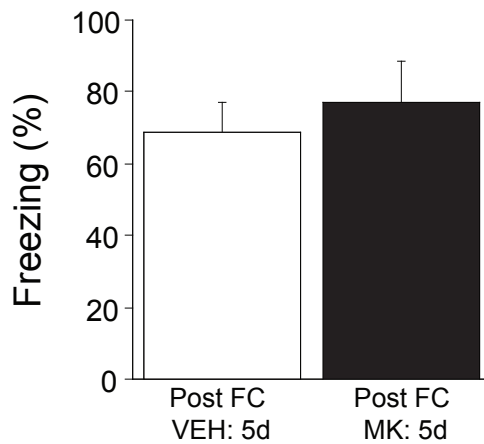

Supplement: NIHMS560310-supplement-7.pdf [file NIHMS560310-supplement-7.pdf]

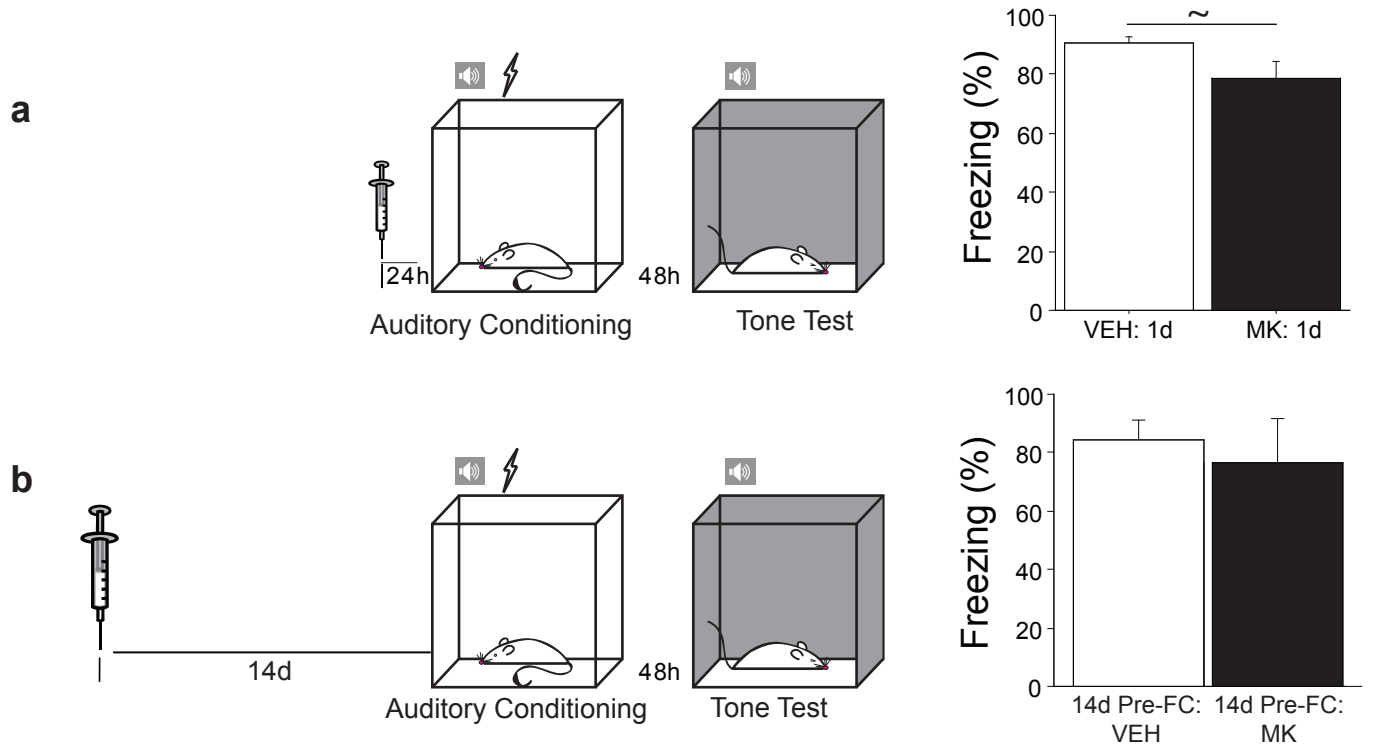

Supplement: NIHMS560310-supplement-8.pdf [file NIHMS560310-supplement-8.pdf]

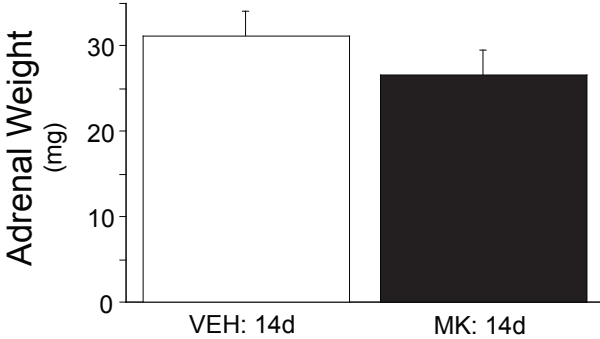

Supplement: NIHMS560310-supplement-9.pdf [file NIHMS560310-supplement-9.pdf]
